# Supplementary material
Source: publisher figshare collection journal article supplement (https://acs.figshare.com/ndownloader/files/4385119)
Supplement: Supplementary file 1 [file 4385119]

## Supplemental materials

**Table 1.** Salt additions for solutions of water with varying hardness. Values are given in mg L<sup>-1</sup> of DI water.

| Type            | NaCO <sub>3</sub> (mg/L) | CaSO <sub>4</sub> ·2H <sub>2</sub> O (mg/L) | MgSO <sub>4</sub> (mg/L) | KCl (mg/L) |
|-----------------|--------------------------|---------------------------------------------|--------------------------|------------|
| Very soft       | 12                       | 7.5                                         | 7.5                      | 0.5        |
| Very soft + Ca  | 12                       | 240                                         | 7.5                      | 0.5        |
| Moderately hard | 96                       | 60                                          | 60                       | 4          |
| Very hard       | 384                      | 240                                         | 240                      | 16         |

**Table 2.** Taxonomic data and summary information for species used. Mass is given as the mean  $\pm$  standard deviation of the wet weights in  $\mu\text{g}$ .

| Order:family                  | Genus species                  | Experimental variables        | [Mn] ( $\mu\text{g L}^{-1}$ ) | Exposure Duration (hours) | Mass ( $\mu\text{g}$ ) |
|-------------------------------|--------------------------------|-------------------------------|-------------------------------|---------------------------|------------------------|
| Ephemeroptera:Ephemerellidae  | <i>Ephemerella dorothea</i>    | Accumulation rates            | 25.6                          | 8                         | $4.4 \pm 0.5$          |
|                               |                                | $k_e$                         | 25.6                          | 240                       | $4.4 \pm 0.5$          |
|                               | <i>Drunella cornutella</i>     | Ca competition                | 24.2                          | 24                        | $4.0 \pm 1.3$          |
|                               |                                | Accumulation rates            | 25.6                          | 8                         | $6.0 \pm 1.5$          |
| Ephemeroptera:Heptageniidae   | <i>Drunella cornuta</i>        | $k_e$                         | 25.6                          | 240                       | $6.0 \pm 1.5$          |
|                               |                                | Ca competition                | 24.2                          | 24                        | $4.5 \pm 1.4$          |
|                               | <i>Maccaffertium pudicum</i>   | Accumulation rates            | 25.6                          | 8                         | $15.4 \pm 7.0$         |
|                               |                                | $k_e$                         | 25.6                          | 240                       | $15.4 \pm 7.0$         |
|                               | <i>Maccaffertium modestum</i>  | Ca competition                | 24.2                          | 24                        | $21.5 \pm 10.0$        |
|                               |                                | Adsorbed oxide quantification | 100                           | 96                        | $16.4 \pm 3.3$         |
|                               | <i>Maccaffertium</i> spp.      | Thiols                        | 100                           | 96                        | $38.9 \pm 7.7$         |
|                               |                                | Adsorbed oxide quantification | 100                           | 96                        | $40.0 \pm 19.5$        |
|                               |                                | Subcellular fractionation     | 100                           | 96                        | $40.0 \pm 19.5$        |
|                               |                                |                               |                               |                           |                        |
| Ephemeroptera:Leptophlebiidae | <i>Epeorus vitreus</i>         | Accumulation rates            | 25.6                          | 8                         | $17.8 \pm 6.5$         |
|                               | <i>Leptophlebiid</i> spp.      | Adsorbed oxide quantification | 100                           | 96                        | $5.5 \pm 3.0$          |
| Ephemeroptera:Isonychiidae    | <i>Isonychia</i> spp.          | Adsorbed oxide quantification | 100                           | 96                        | $26.8 \pm 11.0$        |
| Trichoptera:Hydropsychidae    | <i>Hydropsyche betteni</i>     | $V_{\max}$ and $K_m$          | 0.26 - 400                    | 24                        | $35.8 \pm 5.5$         |
|                               |                                | Thiols                        | 5 - 500                       | 96                        | $52.6 \pm 11.8$        |
|                               | <i>Cheumatopsyche</i> spp.     | Adsorbed oxide quantification | 100                           | 96                        | $6.4 \pm 2.3$          |
|                               |                                | Subcellular fractionation     | 100                           | 96                        | $6.4 \pm 2.3$          |
|                               | <i>Diplectrona modesta</i>     | Thiols                        | 100                           | 96                        | $54.8 \pm 5.0$         |
|                               |                                | Adsorbed oxide quantification | 100                           | 96                        | $19.0 \pm 8.2$         |
|                               |                                | Subcellular fractionation     | 100                           | 96                        | $19.0 \pm 8.2$         |
|                               |                                |                               |                               |                           |                        |
| Trichoptera:Rhyacophilidae    | <i>Rhyacophila fuscula</i>     | Adsorbed oxide quantification | 100                           | 96                        | $25.2 \pm 9.8$         |
| Plecoptera:Perlidae           | <i>Acroneuria carolinensis</i> | Accumulation rates            | 25.6                          | 8                         | $29.1 \pm 13.5$        |
|                               |                                | $k_e$                         | 25.6                          | 240                       | $29.1 \pm 13.5$        |
|                               |                                | Adsorbed oxide quantification | 100                           | 96                        | $123.8 \pm 78.1$       |
|                               |                                | Subcellular fractionation     | 100                           | 96                        | $123.8 \pm 78.1$       |
|                               | <i>Acroneuria abnormis</i>     | Adsorbed oxide quantification | 100                           | 96                        | $114.1 \pm 61.1$       |
|                               |                                | Subcellular fractionation     | 100                           | 96                        | $114.1 \pm 61.1$       |

|                           |                           |                               |      |     |              |
|---------------------------|---------------------------|-------------------------------|------|-----|--------------|
| Plecoptera:Perlodidae     | <i>Acroneuria</i> spp.    | Ca competition                | 24.2 | 24  | 38.0 ± 43.9  |
|                           | <i>Malirekus hastatus</i> | Adsorbed oxide quantification | 100  | 96  | 103.7 ± 17.5 |
|                           |                           | Subcellular fractionation     | 100  | 96  | 103.7 ± 17.5 |
| Plecoptera:Pteronarcyidae | <i>Pteronarcys</i> sp.    | Accumulation rates            | 25.6 | 8   | 184.6 ± 18.9 |
|                           |                           | k <sub>e</sub>                | 25.6 | 240 | 184.6 ± 18.9 |
| Diptera:Tipulidae         | <i>Hexatoma</i> sp.       | Accumulation rates            | 25.6 | 8   | 97.2 ± 14.2  |

## Methods

### *Manganese efflux*

The acquisition of sufficient radioactivity in larvae exposed to relatively low (0.1864 µM) and high (7.281 µM) Mn concentrations allowed us to test the premise that efflux rate constants are independent of tissue concentrations. Following 24 hours of exposure to these concentrations, *H. betteni* larvae were added to individual beakers containing 500 mL of clean reconstituted soft water. The animals and their surrounding water were assayed daily for radioactivity for 10 days. The water was changed on day four of depuration. The efflux rate constant (k<sub>e</sub>) was determined using the equation:

$$C_t = C_i \times e^{-k_e t}$$

Where:

C<sub>i</sub> = Mn concentration in the animal at time 0 (µg Mn g<sup>-1</sup> wet weight)

C<sub>t</sub> = Mn concentration in the animal at time t (µg Mn g<sup>-1</sup> wet weight)

k<sub>e</sub> = efflux rate constant (day<sup>-1</sup>)

t = time in days

The same procedure was used to assess efflux in six species used for uptake experiments (*Ephemerella dorothea*, *Acroneuria carolinensis*, *Drunella cornutella*, *Maccaffertium pudicum*, *Pteronarcys sp.*). Insects were individually placed into approximately 400 mL of uncontaminated ASW for depuration as described above, with water changes at 3 day intervals. Animals were fed periphyton from day 2-7. After ten days, the animals were frozen and stored at -20°C.

#### *Ascorbate Rinse to Remove Mn Oxides*

At the end of the exposure period, animals were counted and rinsed thoroughly with 0.1M ascorbate, which is known to reduce metal oxides (such as iron oxide) at much lower concentrations (1). After the ascorbate rinse, the animals were then rinsed with 0.05M EDTA to remove the reduced Mn, and were finally washed with deionized water. The use of Leucoberbelin Blue, which changes color upon contact with Mn oxides, confirmed that this rinsing process successfully removed Mn oxides from the cuticles (2).

#### *Molting Mn loss from field samples*

We were able to obtain Mn tissue concentrations from US Department of Energy (Oak Ridge) and Tennessee Valley Authority (TVA) biologists from field collected larvae and adult mayflies (*Hexagenia sp.*) from two field sites – the Clinch and Emory Rivers in Tennessee. During the field sampling process, Oak Ridge and TVA scientists archived shed exuvia (sub-imago to imago molt), which they subsequently sent to us for analysis by ICP-MS.

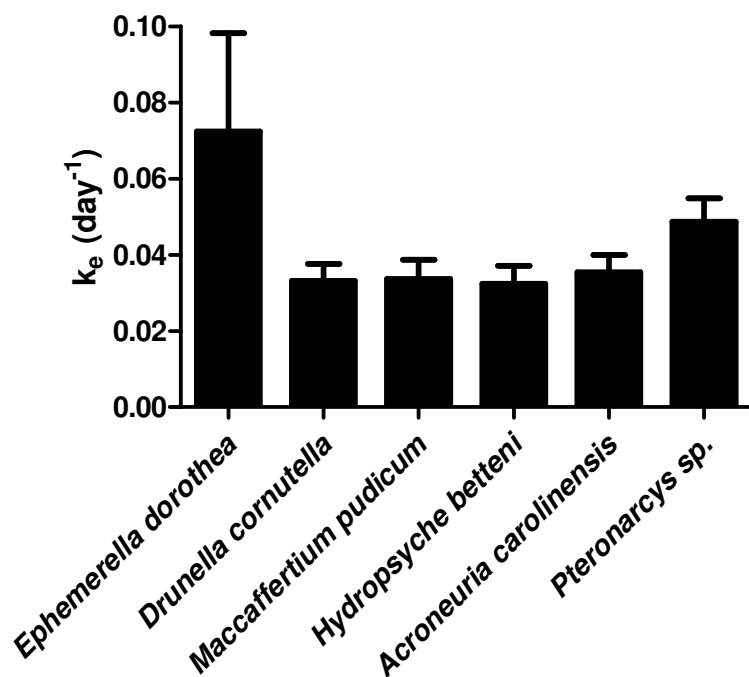

**Figure 1.** Mean ( $\pm$  standard deviation) efflux rate constants,  $k_e$  (day<sup>-1</sup>) for six species of aquatic insects loaded with Mn and depurated in clean water for ten days.

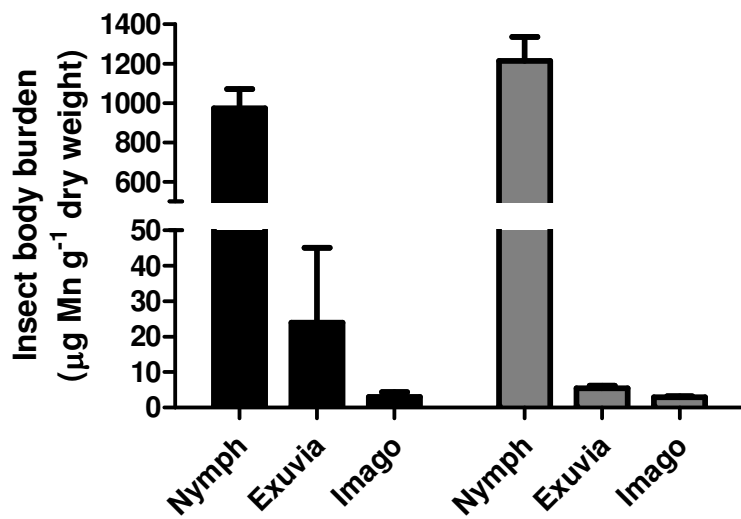

**Figure 2.** Mean ( $\pm$  standard deviation) manganese body burdens ( $\mu\text{g Mn g}^{-1}$  dry weight) of mayfly nymphs, imagos, and exuvia from the sub-imago to imago molt collected from two sites in Tennessee. Black bars indicate samples from Clinch River; grey bars represent Little Emory River.

### Literature Cited

- (1) Larsen, O. and Postma, D. Kinetics of reductive bulk dissolution of lepidocrocite, ferrihydrite, and goethite. *Geochim. Cosmochim. Acta*. **2001**, 65 (9), 1367-1379.
- (2) Krumbein, W. E. and Altmann, H. J. New Method for Detection and Enumeration of Manganese Oxidizing and Reducing Microorganisms. *Helgol. Wiss. Meeresunters.* **1973**, 25 (2-3), 347-356.
